# Supplementary material
Source: PubMed Central journal article supplement (PMC6327853)
Supplement: NIHMS997535-supplement-Supplemental.pdf [file NIHMS997535-supplement-Supplemental.pdf]

## **Supplemental Information**

### **The Genomic Landscape of Endocrine-Resistant Advanced Breast Cancers**

Pedram Razavi, Matthew T. Chang, Guotai Xu, Chaitanya Bandlamudi, Dara S. Ross, Neil Vasan, Yanyan Cai, Craig M. Bielski, Mark T.A. Donoghue, Philip Jonsson, Alexander Penson, Ronglai Shen, Fresia Pareja, Ritika Kundra, Sumit Middha, Michael L. Cheng, Ahmet Zehir, Cyriac Kandoth, Ruchi Patel, Kety Huberman, Lillian M. Smyth, Komal Jhaveri, Shanu Modi, Tiffany A. Traina, Chau Dang, Wen Zhang, Britta Weigelt, Bob T. Li, Marc Ladanyi, David M. Hyman, Nikolaus Schultz, Mark E. Robson, Clifford Hudis, Edi Brogi, Agnes Viale, Larry Norton, Maura N. Dickler, Michael F. Berger, Christine A. Iacobuzio-Donahue, Sarat Chandarlapaty, Maurizio Scaltriti, Jorge S. Reis-Filho, David B. Solit, Barry S. Taylor, and José Baselga

**Table S1, related to Figure 1: Demographic and clinical characteristics of the study cohort.**

|                                      | HR <sup>+</sup> HER2 <sup>-</sup><br>n=1364 | HR <sup>+</sup> HER2 <sup>+</sup><br>n=166 | HR <sup>-</sup> HER2 <sup>+</sup><br>n=58 | TNBC<br>n=168 | p value |
|--------------------------------------|---------------------------------------------|--------------------------------------------|-------------------------------------------|---------------|---------|
| Age at Diagnosis                     |                                             |                                            |                                           |               | 0.001   |
| <40                                  | 220 (16.1)                                  | 42 (25.3)                                  | 11 (19)                                   | 36 (21.4)     |         |
| 40-49                                | 382 (28)                                    | 55 (33.1)                                  | 17 (29.3)                                 | 40 (23.8)     |         |
| 50-59                                | 392 (28.7)                                  | 49 (29.5)                                  | 20 (34.5)                                 | 50 (29.8)     |         |
| ≥60                                  | 370 (27.1)                                  | 20 (12)                                    | 10 (17.2)                                 | 42 (25)       |         |
| Stage at Diagnosis                   |                                             |                                            |                                           |               | <0.001  |
| Stage I                              | 429 (31.5)                                  | 31 (18.7)                                  | 14 (24.1)                                 | 47 (28)       |         |
| Stage II                             | 401 (29.4)                                  | 44 (26.5)                                  | 9 (15.5)                                  | 54 (32.1)     |         |
| Stage III                            | 271 (19.9)                                  | 36 (21.7)                                  | 14 (24.1)                                 | 35 (20.8)     |         |
| Stage IV                             | 252 (18.5)                                  | 53 (31.9)                                  | 21 (36.2)                                 | 32 (19)       |         |
| Not available                        | 11 (0.8)                                    | 2 (1.2)                                    | 0 (0)                                     | 0 (0)         |         |
| Histology                            |                                             |                                            |                                           |               | <0.001  |
| Invasive Ductal                      | 1007 (73.8)                                 | 136 (81.9)                                 | 51 (87.9)                                 | 147 (87.5)    |         |
| Invasive Lobular                     | 253 (18.5)                                  | 15 (9)                                     | 3 (5.2)                                   | 3 (1.8)       |         |
| Mixed Ductal/Lobular                 | 73 (5.4)                                    | 8 (4.8)                                    | 1 (1.7)                                   | 1 (0.6)       |         |
| Carcinoma, NOS                       | 18 (1.3)                                    | 6 (3.6)                                    | 2 (3.4)                                   | 3 (1.8)       |         |
| Other                                | 13 (0.9)                                    | 1 (0.6)                                    | 1 (1.7)                                   | 14 (8.4)      |         |
| Histologic Grade (Primary Tumor)     |                                             |                                            |                                           |               | <0.001  |
| I-Well Differentiated                | 87 (6.4)                                    | 2 (1.2)                                    | 1 (1.7)                                   | 0 (0)         |         |
| II-Moderately Differentiated         | 382 (28)                                    | 26 (15.7)                                  | 6 (10.3)                                  | 9 (5.4)       |         |
| III-Poorly Differentiated            | 747 (54.8)                                  | 120 (72.3)                                 | 47 (81)                                   | 156 (92.9)    |         |
| Not available                        | 148 (10.9)                                  | 18 (10.8)                                  | 4 (6.9)                                   | 3 (1.8)       |         |
| Menopausal Status at Diagnosis       |                                             |                                            |                                           |               | 0.09    |
| Pre                                  | 608 (44.6)                                  | 96 (57.8)                                  | 29 (50.0)                                 | 71 (42.3)     |         |
| Peri                                 | 82 (6)                                      | 7 (4.2)                                    | 4 (6.9)                                   | 7 (4.2)       |         |
| Post                                 | 660 (48.4)                                  | 61 (36.7)                                  | 25 (43.1)                                 | 88 (52.4)     |         |
| Not Applicable (Male)                | 8 (0.6)                                     | 2 (1.2)                                    | 0 (0)                                     | 0 (0)         |         |
| Not Available                        | 6 (0.4)                                     | 0 (0)                                      | 0 (0)                                     | 2 (1.2)       |         |
| Distant Metastasis at last follow-up |                                             |                                            |                                           |               | <0.001  |
| Yes                                  | 948 (69.5)                                  | 143 (86.1)                                 | 49 (84.5)                                 | 121 (72)      |         |

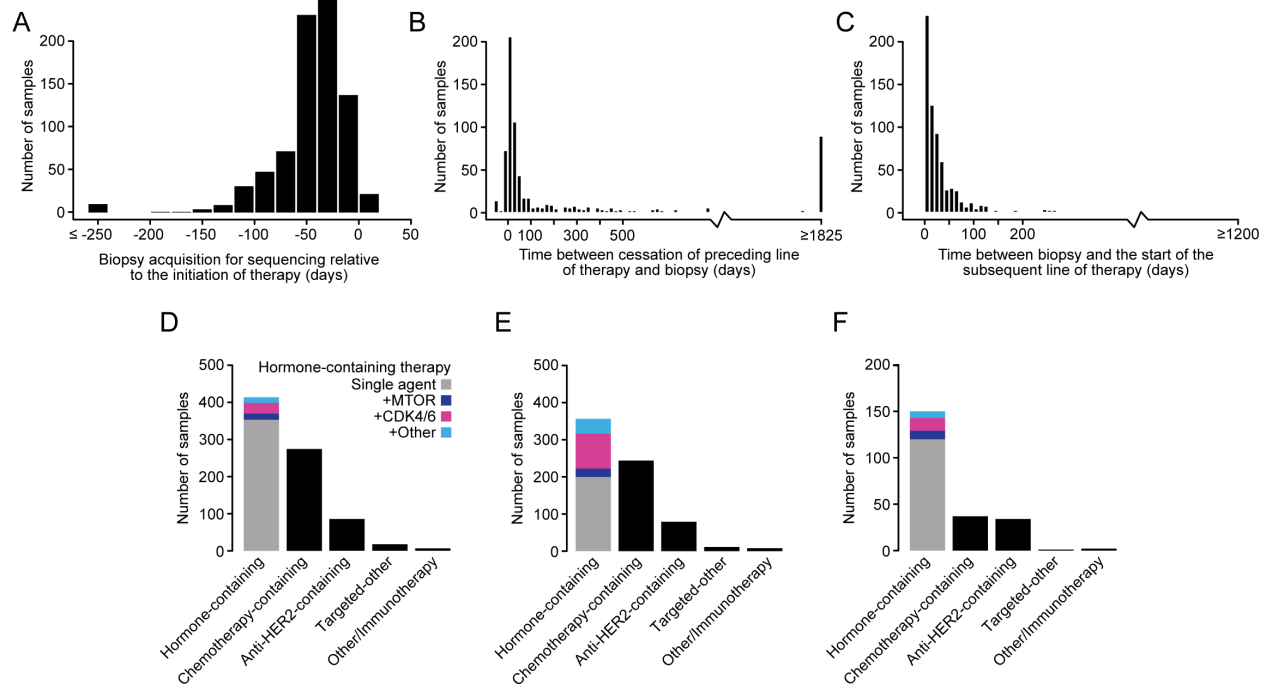

**Figure S1, related to Figure 1: Treatment lines and biopsies for prospective sequencing.** (A) In 912 treatment-naïve tumor specimens acquired prior to the start of therapy, the time in days between biopsy acquisition for sequencing the initiation of therapy is shown. (B) For 782 samples sequenced from a biopsy obtained after at least one line of therapy, the time is shown between the cessation of the immediately preceding line of therapy and the biopsy for sequencing. (C) For the same post-treatment specimens shown in panel (B), the time between the biopsy for sequencing and the start of the next line of therapy (in days) is shown. (D) The distribution of therapy type is shown for the line of therapy directly preceding biopsy for post-treatment specimens. (E) As in panel (D) but for the line of therapy directly following the biopsy for sequencing. (F) For 224 samples that were acquired on-treatment (184 of which also received prior therapies), the line of therapy during which the biopsy occurred is indicated by category.

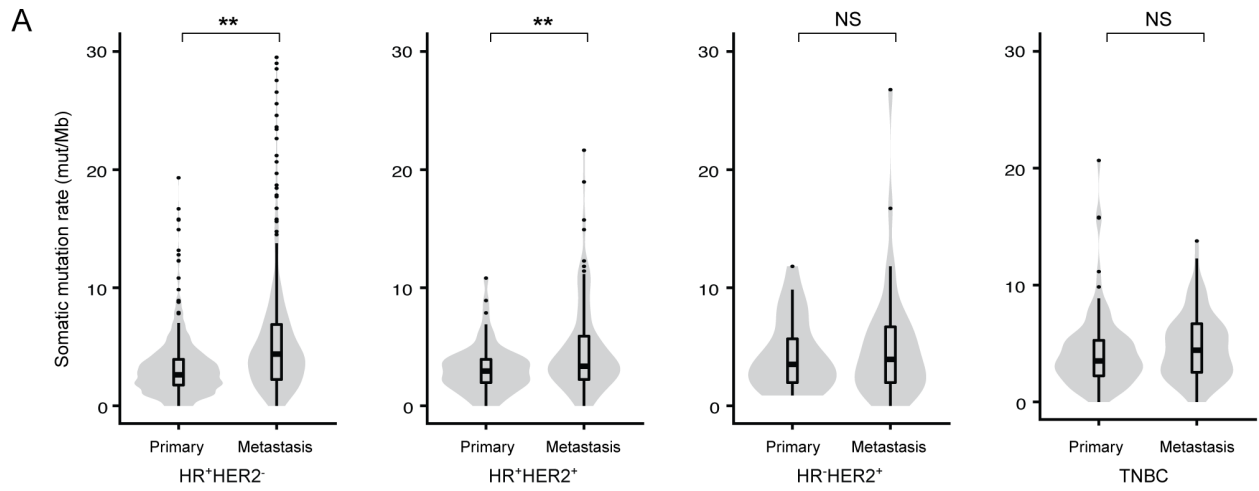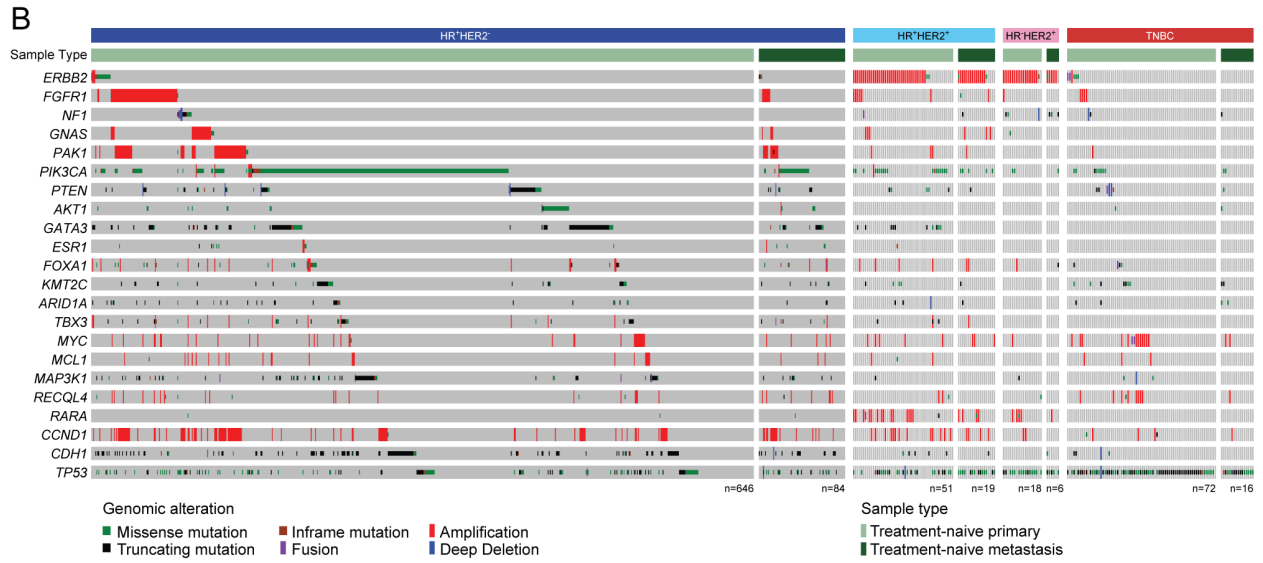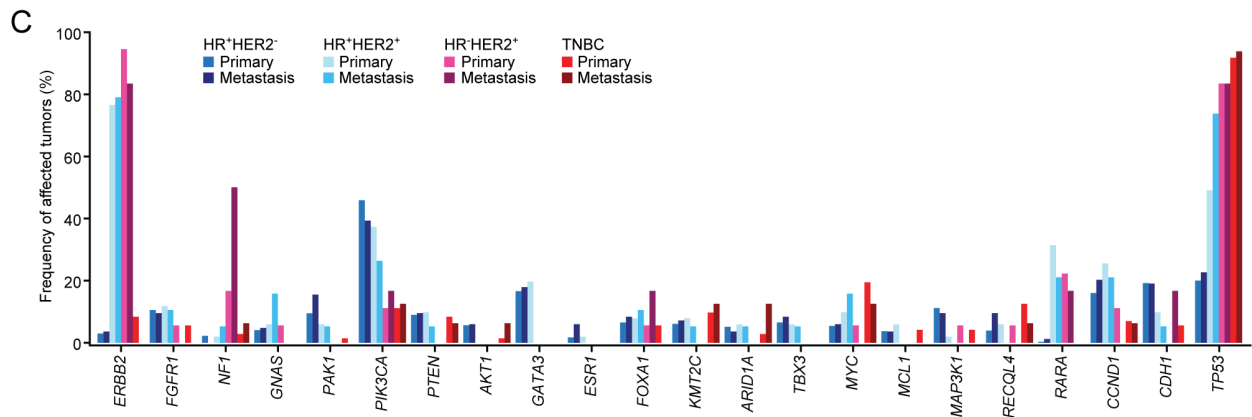

**Figure S2, related to Figure 2: (A) Mutational burden in primary and metastatic tumors by receptor subtype.** The somatic mutational burden is shown in primary and metastatic specimens by receptor subtype as estimated from prospective sequencing (and shown as mutations per megabase of sequence). Asterisks indicate a statistically significant those modest difference among HR<sup>+</sup>HER2<sup>-</sup> and HR<sup>+</sup>HER2<sup>+</sup> patients. The violin plots represent the distribution of the data. The bottom and top of the boxplot represent the lower and upper quartiles, respectively, and the band near the middle of the box represents the median. The upper whisker represents the upper quartile +1.5 x interquartile range (IQR) and the lower whisker represents the lower quartile - 1.5 x IQR. The dots represent the outliers. **(B and C) Analysis of treatment-naïve primary and metastatic cohorts. (B)** The pattern, frequency, and type of genomic alterations in key breast cancer genes (as shown in Fig. 2A) in 787 treatment-naïve primary tumors (left) compared to 125 treatment-naïve metastatic tumors (predominantly [n=103] *de novo* metastatic disease, right) for each of the four indicated receptor subtypes. **(C)** Comparison of the frequency of alterations in the genes and subtypes in panel (B). No statistically significant changes were evident after correcting for multiple comparisons given the small sample sizes of most comparisons.



**Figure S3, related to Figure 2: (A) Gene-level comparisons of alteration rates by receptor subtype.** The frequency of alterations in breast cancer genes by receptor subtype in this cohort and the primary untreated breast cancers of The Cancer Genome Atlas study. (Cancer Genome Atlas, 2012) Significant differences are indicated by red asterisks. **(B, C, and D) Driver mutations reveal candidate actionability.** **(B)** The number of hotspots identified in one of 30 genes are shown as is the number affected patients. *ESR1* is highlighted in red. **(C)** The pattern and frequency of hotspot mutations in *PIK3CA*, *ERBB2*, and *RHOA* are shown. Mutations in blue have not been previously described or studied. Mutations arising at positions paralogous to mutant alleles in closely related family members are indicated below the linear schematic of the relevant gene. **(D)** All five novel *PIK3CA* hotspot mutations identified here induced levels of phosphorylated AKT (T308/S473) and PRAS40 higher than did expression of the wild-type p110a in MCF10A mammary epithelial cells. **(E) SPOP E78K mutations in HR<sup>+</sup>HER2<sup>-</sup> breast cancers.** A linear schematic of SPOP and its domain structure is shown with the pattern and frequency of somatic mutations from a large pan-cancer cohort (Zehir et al., 2017) and this study cohort of breast cancers (bottom). The E78K hotspot is identified. At right is the three-dimensional structure of SPOP with mutations as indicated in the legend. **(F) Structure of histology-specific hotspots in FOXA1.** Hotspots arising in *FOXA1* are either specific to lobular or ductal cancers (orange and blue, respectively) and target different wings of the transcription factor (as bound to DNA) while a single I176 hotspot arises in mixed histology tumors.

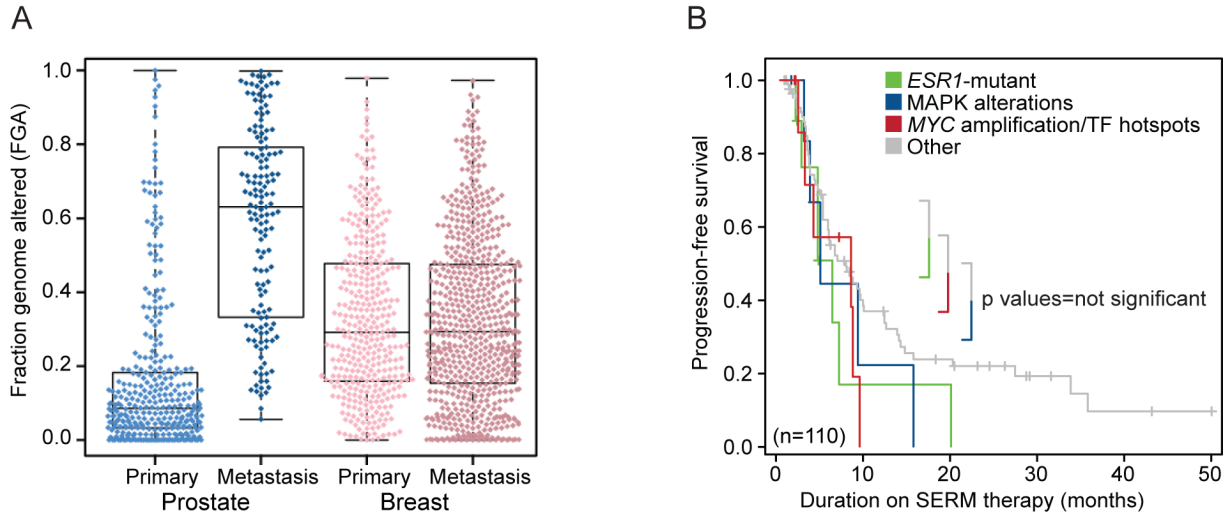

**Figure S4, related to Figure 3: (A) Copy number burden by disease state.** The overall burden of DNA copy number alterations genome wide is shown for primary and metastatic prostate and breast cancers. The bottom and top of the boxplot represent the lower and upper quartiles, respectively, and the band near the middle of the box represents the median. The upper whisker represents the upper quartile +1.5 x interquartile range (IQR) and the lower whisker represents the lower quartile - 1.5 x IQR. **(B) Outcomes on first-line SERM therapy and classes of genomic alterations.** Kaplan-Meier curve displaying the progression-free survival of patients receiving first-line SERM alone after their biopsy for prospective sequencing. Genotypic classes are shown as in Figure 3C-D) and outcome is compared to patients whose tumors were wild-type for such lesions (gray). All p value are not significant, log rank test.



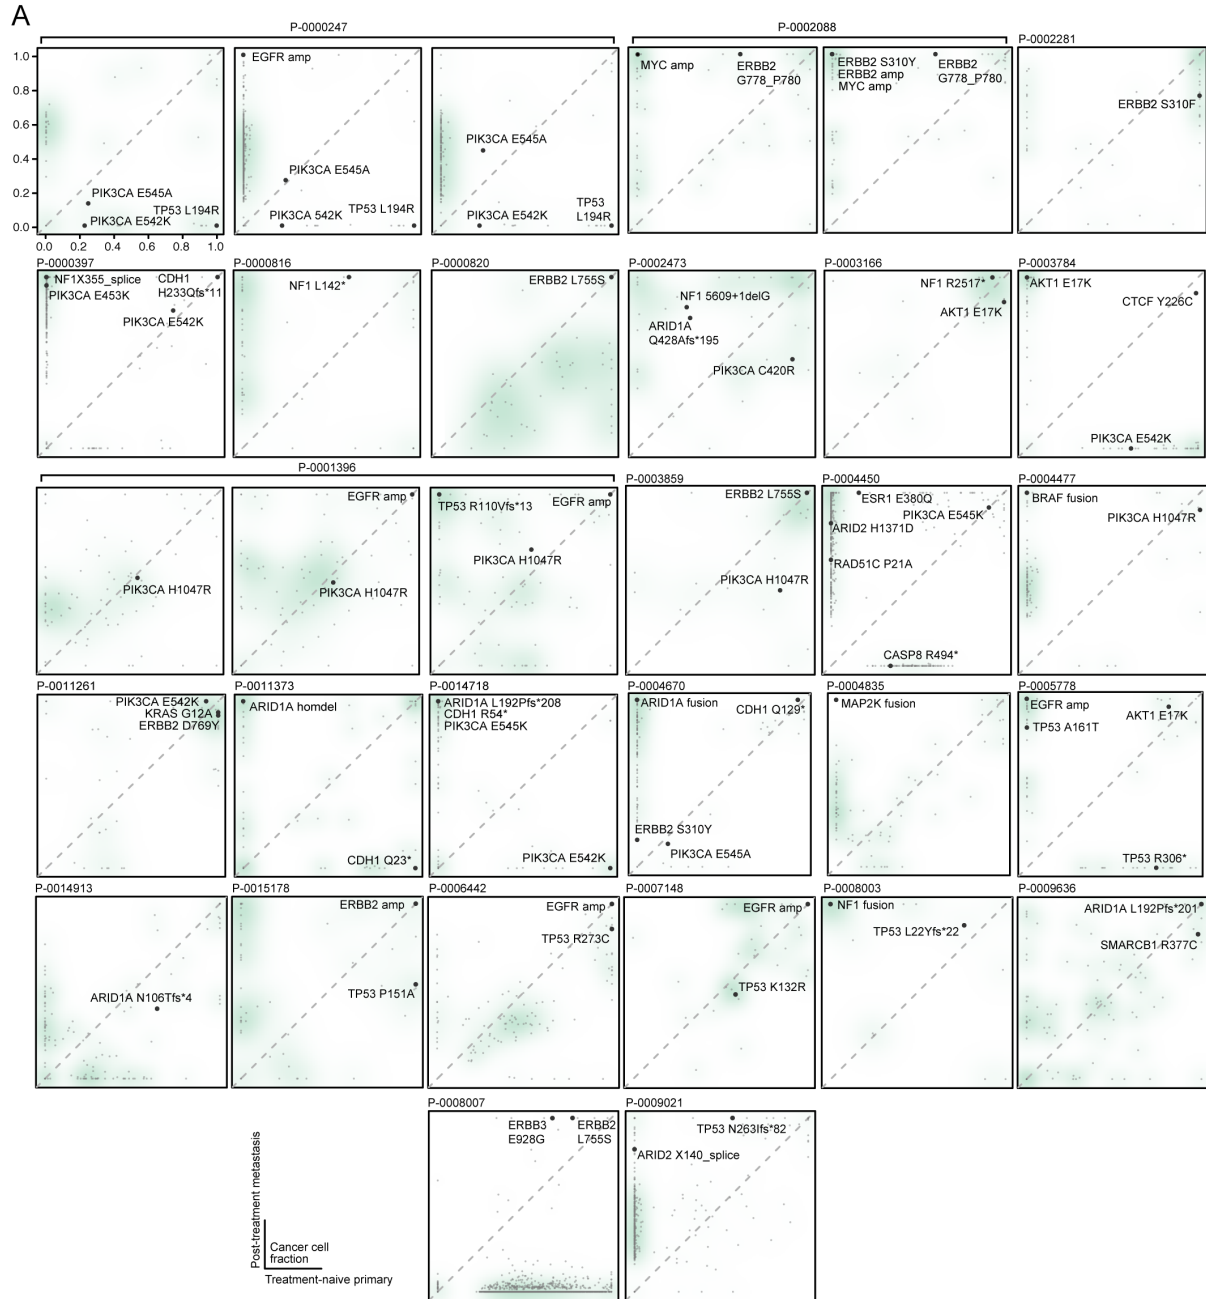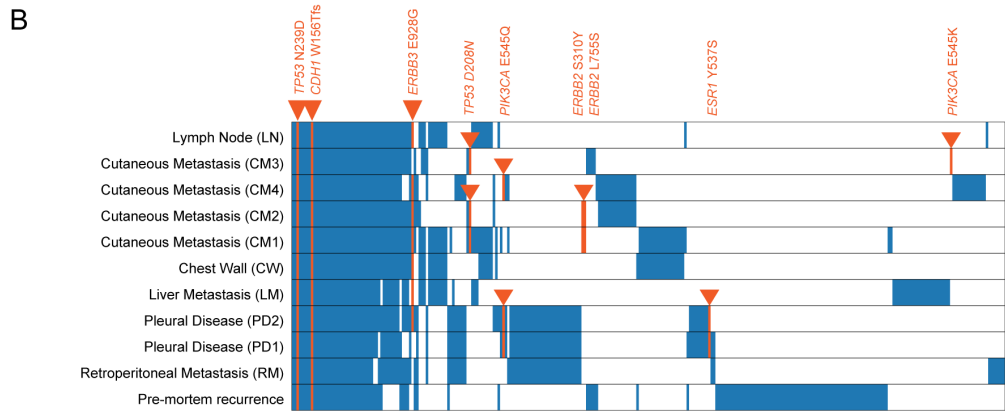

**Figure S5, related to Figure 4: (A) Additional 27 patients with matched pre- and post-treatment WES.** For all patients with matched pairs of treatment-naïve primary and post-treatment metastatic specimens that underwent whole-exome sequencing, the distribution of cancer cell fraction (estimated fraction of cancer cells affected by somatic mutations) are shown. Each box represents a patient (patient identifier as indicated). The x- and y-axes show the treatment-naïve primary and post-treatment metastatic specimens respectively. Green shading represents clusters of somatic mutations at different cancer cell fractions (~1 is clonal). The individual gray points represent all mutations detected. Identified in each patient are both the candidate mechanisms of endocrine therapy resistance and other breast cancer driver mutations in the patients. **(B) Common and private somatic mutational patterns in the autopsy.** Somatic mutations (blue) identified in the whole-exome sequencing of a pre-mortem recurrent cutaneous metastasis and 10 metastatic specimens obtained post-mortem. Shared mutations (common to all sites of disease or common to only subsets of disease sites are shown as are private mutations arising specifically in a single metastatic site but not the others. Driver mutations and those mutations presumed to mediate endocrine resistance (*ERBB2* and *ESR1*) are identified in orange.

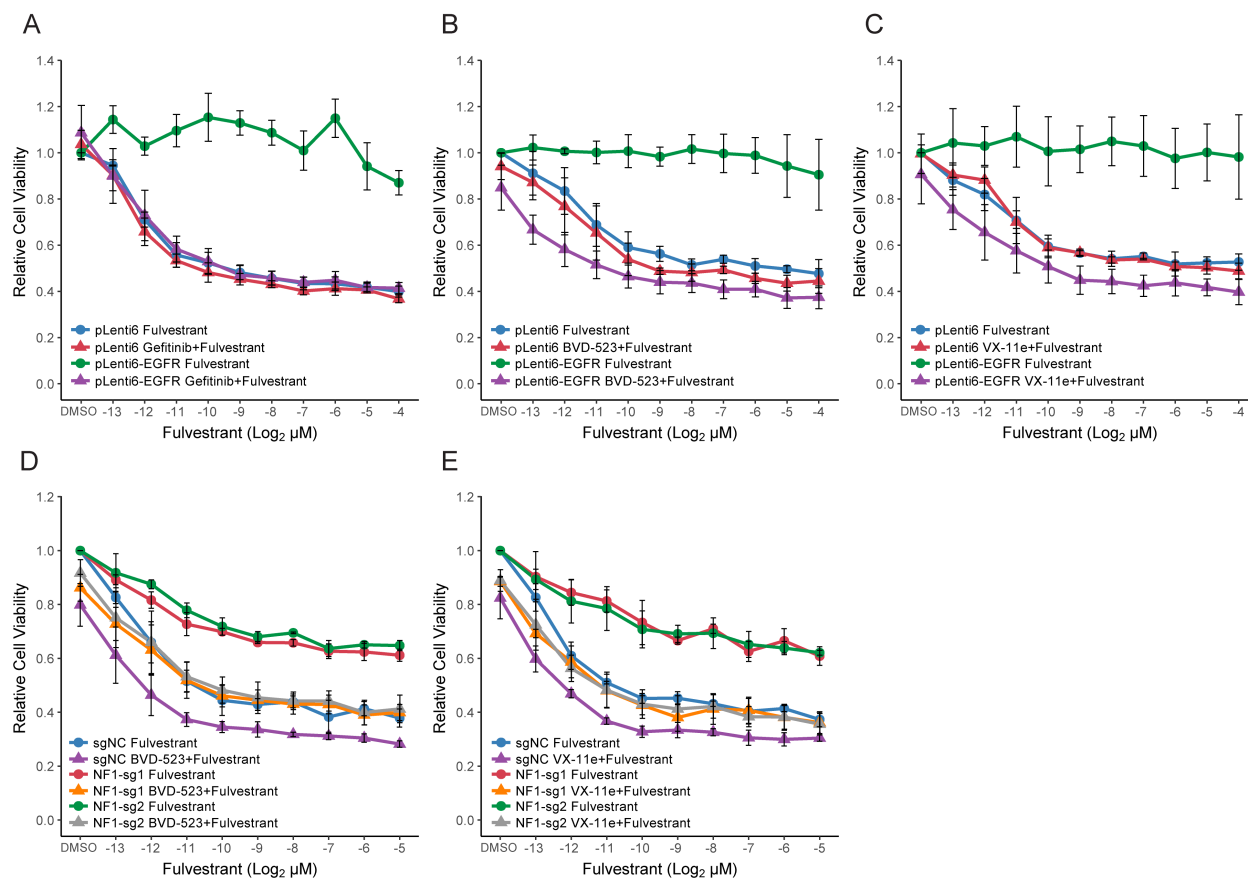

**Figure S6, related to Figure 5: Functional validation of MAPK activation as mechanism of resistance to endocrine therapy: (A-C) Cell viability of MCF7 stably transfected with pLenti6 mock control or pLenti6-EGFR upon treatment with fulvestrant or fulvestrant + gefitinib (A), fulvestrant + BVD-523 (B), or fulvestrant + VX-11e (C). (D and E) Cell viability of two independent NF1 knock out clones treated with fulvestrant or fulvestrant + BVD-523 (D), or fulvestrant + VX-11e (E). Error bars represent standard deviations.**
